# Supplementary material
Source: MDPI journal article supplement (https://www.mdpi.com/2073-4395/13/9/2313)
Supplement: s1 [file s1]

### Meteorological data during the period of experimentation

| Months        | Temperature (°C) |       | Total rainfall<br>(mm) | Relative<br>humidity (%) | Sunshine hours |
|---------------|------------------|-------|------------------------|--------------------------|----------------|
|               | Max.             | Min.  |                        |                          |                |
| January, 2021 | 24.81            | 11.89 | 0.00                   | 52.04                    | 4.02           |
| February      | 29.35            | 13.86 | 1.10                   | 39.21                    | 6.72           |
| March         | 35.98            | 20.78 | 0.00                   | 33.14                    | 6.92           |
| April         | 37.01            | 24.63 | 25.90                  | 41.16                    | 8.26           |
| May           | 34.24            | 24.73 | 352.40                 | 66.04                    | 6.61           |
| June          | 32.67            | 25.85 | 358.20                 | 77.69                    | 3.77           |
| January, 2022 | 23.66            | 12.39 | 25.80                  | 60.38                    | 5.15           |
| February      | 26.70            | 13.10 | 24.50                  | 49.95                    | 7.44           |
| March         | 34.30            | 20.98 | 0.00                   | 45.29                    | 8.21           |
| April         | 36.72            | 26.09 | 0.00                   | 50.84                    | 6.84           |
| May           | 34.00            | 24.71 | 202.10                 | 66.78                    | 6.08           |
| June          | 34.40            | 26.21 | 370.25                 | 66.40                    | 4.11           |
